# Supplementary material for: Histological study on the influence of puberty suppression and hormonal treatment on developing germ cells in transgender women
Source: PubMed Central journal article supplement — Hum Reprod. 2021 Nov 13;37(2):297–308. doi: 10.1093/humrep/deab240 (PMC8804334; doi:10.1093/humrep/deab240), 2021-11-13
Supplement: deab240_supplementary_figure_s1.pdf [file deab240_supplementary_figure_s1.pdf]

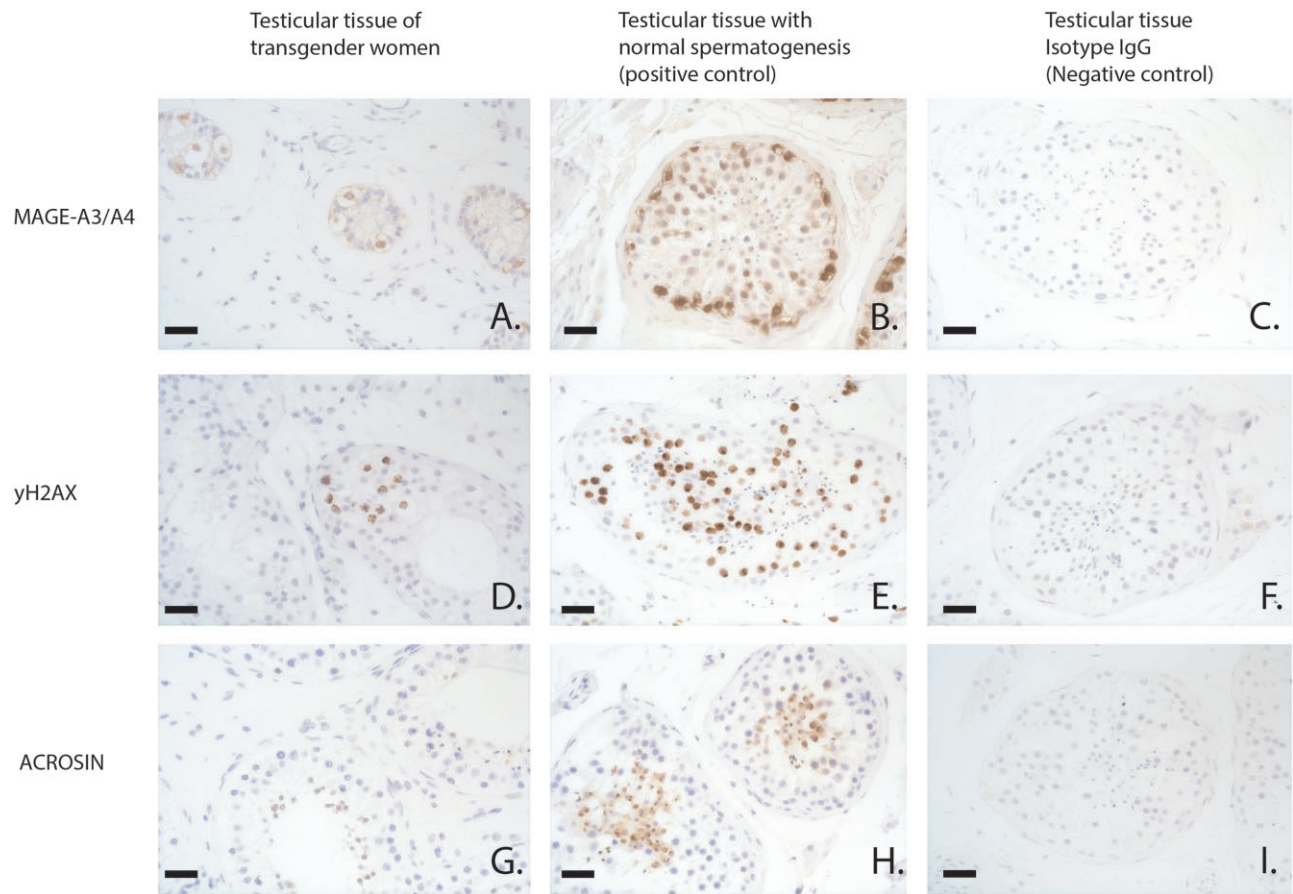

**Supplementary Figure S1. Immunohistochemical analyses.** (A) MAG-3A/A4 in transgender women. (B) MAG-3A/A4 positive control. (C) MAG-3A/A4 negative control. (D)  $\gamma$ H2AX in transgender women. (E)  $\gamma$ H2AX positive control. (F)  $\gamma$ H2AX negative control. (G) Acrosin in transgender women. (H) Acrosin positive control. (I) Acrosin negative control. Bar represents 20  $\mu$ m.
