# Supplementary material for: Histological study on the influence of puberty suppression and hormonal treatment on developing germ cells in transgender women
Source: PubMed Central journal article supplement — Hum Reprod. 2021 Nov 13;37(2):297–308. doi: 10.1093/humrep/deab240 (PMC8804334; doi:10.1093/humrep/deab240), 2021-11-13
Supplement: deab240_supplementary_table_s1.pdf [file deab240_supplementary_table_s1.pdf]

**Supplementary Table S1** The Modified Johnsen's scoring system.

| Johnsen score | Characteristics                                                                                                                   |
|---------------|-----------------------------------------------------------------------------------------------------------------------------------|
| <b>1</b>      | No recognizable seminiferous epithelium (sclerosis)                                                                               |
| <b>2</b>      | Sertoli cell only (SCO), absence of germ cells                                                                                    |
| <b>3</b>      | Only the presence of spermatogonia alongside Sertoli cells, but no spermatocytes                                                  |
| <b>4</b>      | Presence of 1–10 spermatocytes, but no spermatids                                                                                 |
| <b>5</b>      | Presence of $\geq 10$ spermatocytes, but no spermatids                                                                            |
| <b>6</b>      | Presence of 1–10 round spermatids, but no elongated spermatids                                                                    |
| <b>7</b>      | Presence $\geq 10$ round spermatids, but no elongated spermatids                                                                  |
| <b>8</b>      | Presence of 1–10 elongated spermatids                                                                                             |
| <b>9</b>      | Presence of $\geq 10$ elongated spermatids, but a disorganized epithelium with released immature and apoptotic cells in the lumen |
| <b>10</b>     | Presence of $\geq 10$ elongated spermatids without immature and apoptotic cells in lumen                                          |
