# Supplementary material for: Histological study on the influence of puberty suppression and hormonal treatment on developing germ cells in transgender women
Source: PubMed Central journal article supplement — Hum Reprod. 2021 Nov 13;37(2):297–308. doi: 10.1093/humrep/deab240 (PMC8804334; doi:10.1093/humrep/deab240), 2021-11-13
Supplement: deab240_supplementary_table_s2.pdf [file deab240_supplementary_table_s2.pdf]

Supplementary Table SII The Modified Johnsen's score (JS) for each individual.

| ID | Number of seminiferous tubules with corresponding JS |     |     |     |     |     |     |     |     |      | Mean JS |
|----|------------------------------------------------------|-----|-----|-----|-----|-----|-----|-----|-----|------|---------|
|    | JS1                                                  | JS2 | JS3 | JS4 | JS5 | JS6 | JS7 | JS8 | JS9 | JS10 |         |
| 1  | 0                                                    | 13  | 27  | 10  | 0   | 0   | 0   | 0   | 0   | 0    | 2.94    |
| 2  | 0                                                    | 5   | 31  | 15  | 0   | 0   | 0   | 0   | 0   | 0    | 3.2     |
| 3  | 6                                                    | 42  | 6   | 0   | 0   | 0   | 0   | 0   | 0   | 0    | 1.96    |
| 4  | 0                                                    | 36  | 14  | 0   | 0   | 0   | 0   | 0   | 0   | 0    | 2.28    |
| 5  | 0                                                    | 41  | 9   | 0   | 0   | 0   | 0   | 0   | 0   | 0    | 2.18    |
| 6  | 0                                                    | 39  | 12  | 0   | 0   | 0   | 0   | 0   | 0   | 0    | 2.24    |
| 8  | 5                                                    | 32  | 13  | 0   | 0   | 0   | 0   | 0   | 0   | 0    | 2.16    |
| 9  | 4                                                    | 24  | 21  | 1   | 0   | 0   | 0   | 0   | 0   | 0    | 2.38    |
| 10 | 19                                                   | 29  | 3   | 0   | 0   | 0   | 0   | 0   | 0   | 0    | 1.72    |
| 11 | 0                                                    | 25  | 21  | 4   | 0   | 0   | 0   | 0   | 0   | 0    | 2.58    |
| 14 | 1                                                    | 24  | 24  | 4   | 0   | 0   | 0   | 0   | 0   | 0    | 2.54    |
| 15 | 32                                                   | 18  | 0   | 0   | 0   | 0   | 0   | 0   | 0   | 0    | 1.36    |
| 16 | 4                                                    | 40  | 6   | 0   | 0   | 0   | 0   | 0   | 0   | 0    | 2.04    |
| 17 | 7                                                    | 44  | 0   | 0   | 0   | 0   | 0   | 0   | 0   | 0    | 1.86    |
| 18 | 23                                                   | 18  | 11  | 0   | 0   | 0   | 0   | 0   | 0   | 0    | 1.77    |
| 19 | 0                                                    | 24  | 30  | 0   | 0   | 0   | 0   | 0   | 0   | 0    | 2.56    |
| 20 | 21                                                   | 29  | 0   | 0   | 0   | 0   | 0   | 0   | 0   | 0    | 1.58    |
| 21 | 0                                                    | 16  | 35  | 0   | 0   | 0   | 0   | 0   | 0   | 0    | 2.69    |
| 22 | 4                                                    | 29  | 19  | 0   | 0   | 0   | 0   | 0   | 0   | 0    | 2.29    |
| 23 | 0                                                    | 38  | 13  | 0   | 0   | 0   | 0   | 0   | 0   | 0    | 2.26    |
| 24 | 9                                                    | 38  | 2   | 0   | 0   | 0   | 0   | 0   | 0   | 0    | 1.86    |
| 25 | 0                                                    | 0   | 38  | 12  | 0   | 0   | 0   | 0   | 0   | 0    | 3.24    |
| 26 | 0                                                    | 1   | 10  | 33  | 6   | 2   | 0   | 0   | 0   | 0    | 3.96    |
| 27 | 4                                                    | 20  | 23  | 3   | 0   | 0   | 0   | 0   | 0   | 0    | 2.5     |
| 28 | 8                                                    | 29  | 14  | 0   | 0   | 0   | 0   | 0   | 0   | 0    | 2.12    |
| 29 | 0                                                    | 17  | 31  | 3   | 0   | 0   | 0   | 0   | 0   | 0    | 2.73    |
| 30 | 0                                                    | 1   | 6   | 16  | 17  | 5   | 4   | 1   | 0   | 0    | 4.7     |
| 31 | 0                                                    | 1   | 16  | 28  | 6   | 0   | 0   | 0   | 0   | 0    | 3.76    |
| 32 | 0                                                    | 31  | 5   | 14  | 0   | 0   | 0   | 0   | 0   | 0    | 2.66    |
| 33 | 1                                                    | 16  | 28  | 6   | 0   | 0   | 0   | 0   | 0   | 0    | 2.76    |
| 34 | 8                                                    | 26  | 15  | 1   | 0   | 0   | 0   | 0   | 0   | 0    | 2.18    |
| 35 | 5                                                    | 36  | 11  | 0   | 0   | 0   | 0   | 0   | 0   | 0    | 2.12    |
| 37 | 0                                                    | 5   | 18  | 22  | 4   | 0   | 0   | 1   | 0   | 0    | 3.6     |
| 38 | 0                                                    | 9   | 43  | 2   | 0   | 0   | 0   | 0   | 0   | 0    | 2.87    |
| 39 | 2                                                    | 20  | 30  | 0   | 0   | 0   | 0   | 0   | 0   | 0    | 2.54    |
| 40 | 6                                                    | 37  | 6   | 1   | 0   | 0   | 0   | 0   | 0   | 0    | 2.04    |
| 41 | 0                                                    | 40  | 10  | 1   | 0   | 0   | 0   | 0   | 0   | 0    | 2.24    |
| 42 | 0                                                    | 37  | 14  | 0   | 0   | 0   | 0   | 0   | 0   | 0    | 2.28    |
| 45 | 2                                                    | 41  | 9   | 0   | 0   | 0   | 0   | 0   | 0   | 0    | 2.13    |
| 46 | 0                                                    | 42  | 4   | 4   | 0   | 0   | 0   | 0   | 0   | 0    | 2.24    |
| 47 | 4                                                    | 25  | 23  | 0   | 0   | 0   | 0   | 0   | 0   | 0    | 2.37    |
| 48 | 0                                                    | 12  | 40  | 0   | 0   | 0   | 0   | 0   | 0   | 0    | 2.77    |
| 49 | 2                                                    | 9   | 40  | 0   | 0   | 0   | 0   | 0   | 0   | 0    | 2.75    |

(continued)

Supplementary Table SII Continued

| ID | Number of seminiferous tubules with corresponding JS |     |     |     |     |     |     |     |     |      | Mean JS |
|----|------------------------------------------------------|-----|-----|-----|-----|-----|-----|-----|-----|------|---------|
|    | JS1                                                  | JS2 | JS3 | JS4 | JS5 | JS6 | JS7 | JS8 | JS9 | JS10 |         |
| 51 | 2                                                    | 2   | 49  | 0   | 0   | 0   | 0   | 0   | 0   | 0    | 2.89    |
| 52 | 2                                                    | 8   | 41  | 0   | 0   | 0   | 0   | 0   | 0   | 0    | 2.76    |
| 53 | 1                                                    | 3   | 48  | 0   | 0   | 0   | 0   | 0   | 0   | 0    | 2.9     |
| 55 | 50                                                   | 0   | 0   | 0   | 0   | 0   | 0   | 0   | 0   | 0    | 1       |
| 56 | 16                                                   | 34  | 0   | 0   | 0   | 0   | 0   | 0   | 0   | 0    | 1.68    |
| 57 | 2                                                    | 7   | 43  | 0   | 0   | 0   | 0   | 0   | 0   | 0    | 2.79    |
| 58 | 1                                                    | 44  | 8   | 0   | 0   | 0   | 0   | 0   | 0   | 0    | 2.13    |
| 59 | 6                                                    | 17  | 28  | 0   | 0   | 0   | 0   | 0   | 0   | 0    | 2.43    |
| 60 | 12                                                   | 35  | 4   | 0   | 0   | 0   | 0   | 0   | 0   | 0    | 1.84    |
| 62 | 2                                                    | 32  | 12  | 5   | 0   | 0   | 0   | 0   | 0   | 0    | 2.39    |
| 63 | 12                                                   | 38  | 0   | 0   | 0   | 0   | 0   | 0   | 0   | 0    | 1.76    |
| 65 | 4                                                    | 26  | 19  | 1   | 0   | 0   | 0   | 0   | 0   | 0    | 2.34    |
| 66 | 5                                                    | 12  | 35  | 0   | 0   | 0   | 0   | 0   | 0   | 0    | 2.58    |
| 67 | 8                                                    | 42  | 0   | 0   | 0   | 0   | 0   | 0   | 0   | 0    | 1.84    |
| 68 | 5                                                    | 35  | 11  | 0   | 0   | 0   | 0   | 0   | 0   | 0    | 2.12    |
| 69 | 2                                                    | 37  | 11  | 0   | 0   | 0   | 0   | 0   | 0   | 0    | 2.18    |
| 70 | 2                                                    | 50  | 1   | 0   | 0   | 0   | 0   | 0   | 0   | 0    | 1.98    |
| 71 | 2                                                    | 26  | 16  | 5   | 0   | 0   | 0   | 0   | 0   | 0    | 2.49    |
| 72 | 1                                                    | 15  | 31  | 3   | 0   | 0   | 0   | 0   | 0   | 0    | 2.72    |
| 73 | 0                                                    | 10  | 34  | 6   | 0   | 0   | 0   | 0   | 0   | 0    | 2.92    |
| 74 | 0                                                    | 9   | 15  | 26  | 0   | 0   | 0   | 0   | 0   | 0    | 3.34    |
| 75 | 9                                                    | 41  | 6   | 0   | 0   | 0   | 0   | 0   | 0   | 0    | 1.95    |
| 76 | 1                                                    | 46  | 3   | 0   | 0   | 0   | 0   | 0   | 0   | 0    | 2.04    |
| 77 | 0                                                    | 30  | 13  | 8   | 0   | 0   | 0   | 0   | 0   | 0    | 2.57    |
| 78 | 1                                                    | 27  | 16  | 1   | 0   | 0   | 0   | 0   | 0   | 0    | 2.38    |
| 79 | 18                                                   | 32  | 0   | 0   | 0   | 0   | 0   | 0   | 0   | 0    | 1.64    |
| 80 | 2                                                    | 31  | 19  | 0   | 0   | 0   | 0   | 0   | 0   | 0    | 2.33    |
| 81 | 1                                                    | 5   | 40  | 4   | 0   | 0   | 0   | 0   | 0   | 0    | 2.94    |
| 82 | 7                                                    | 8   | 33  | 3   | 0   | 0   | 0   | 0   | 0   | 0    | 2.63    |
| 83 | 9                                                    | 43  | 0   | 0   | 0   | 0   | 0   | 0   | 0   | 0    | 1.83    |
| 84 | 1                                                    | 33  | 17  | 0   | 0   | 0   | 0   | 0   | 0   | 0    | 2.31    |
| 85 | 0                                                    | 7   | 22  | 11  | 3   | 8   | 4   | 3   | 0   | 0    | 4.12    |
| 86 | 0                                                    | 35  | 14  | 2   | 0   | 0   | 0   | 0   | 0   | 0    | 2.35    |
| 87 | 16                                                   | 20  | 14  | 0   | 0   | 0   | 0   | 0   | 0   | 0    | 1.96    |
| 88 | 0                                                    | 6   | 43  | 3   | 0   | 0   | 0   | 0   | 0   | 0    | 2.94    |
| 89 | 0                                                    | 21  | 5   | 25  | 2   | 0   | 0   | 0   | 0   | 0    | 3.15    |
| 91 | 0                                                    | 4   | 14  | 19  | 8   | 9   | 0   | 1   | 0   | 0    | 4.15    |
| 92 | 2                                                    | 12  | 38  | 0   | 0   | 0   | 0   | 0   | 0   | 0    | 2.69    |
| 93 | 10                                                   | 45  | 1   | 0   | 0   | 0   | 0   | 0   | 0   | 0    | 1.84    |
| 94 | 1                                                    | 6   | 44  | 0   | 0   | 0   | 0   | 0   | 0   | 0    | 2.84    |
| 95 | 2                                                    | 3   | 45  | 0   | 0   | 0   | 0   | 0   | 0   | 0    | 2.86    |
| 96 | 4                                                    | 5   | 43  | 0   | 0   | 0   | 0   | 0   | 0   | 0    | 2.75    |
| 97 | 9                                                    | 41  | 2   | 0   | 0   | 0   | 0   | 0   | 0   | 0    | 1.87    |

(continued)

Supplementary Table SII Continued

| ID  | Number of seminiferous tubules with corresponding JS |     |     |     |     |     |     |     |     |      | Mean JS |
|-----|------------------------------------------------------|-----|-----|-----|-----|-----|-----|-----|-----|------|---------|
|     | JS1                                                  | JS2 | JS3 | JS4 | JS5 | JS6 | JS7 | JS8 | JS9 | JS10 |         |
| 100 | 7                                                    | 10  | 35  | 0   | 0   | 0   | 0   | 0   | 0   | 0    | 2.54    |
| 101 | 16                                                   | 34  | 0   | 0   | 0   | 0   | 0   | 0   | 0   | 0    | 1.68    |
| 102 | 1                                                    | 6   | 44  | 0   | 0   | 0   | 0   | 0   | 0   | 0    | 2.69    |
| 103 | 1                                                    | 4   | 46  | 0   | 0   | 0   | 0   | 0   | 0   | 0    | 2.88    |
| 104 | 4                                                    | 44  | 9   | 0   | 0   | 0   | 0   | 0   | 0   | 0    | 2.09    |
| 105 | 35                                                   | 6   | 20  | 0   | 0   | 0   | 0   | 0   | 0   | 0    | 1.75    |
| 106 | 3                                                    | 6   | 43  | 0   | 0   | 0   | 0   | 0   | 0   | 0    | 2.77    |
| 110 | 0                                                    | 3   | 47  | 0   | 0   | 0   | 0   | 0   | 0   | 0    | 2.94    |
| 112 | 3                                                    | 3   | 45  | 0   | 0   | 0   | 0   | 0   | 0   | 0    | 2.82    |
| 113 | 12                                                   | 39  | 3   | 0   | 0   | 0   | 0   | 0   | 0   | 0    | 1.83    |
| 114 | 3                                                    | 4   | 44  | 0   | 0   | 0   | 0   | 0   | 0   | 0    | 2.8     |
| 115 | 1                                                    | 5   | 45  | 0   | 0   | 0   | 0   | 0   | 0   | 0    | 2.86    |
| 117 | 4                                                    | 23  | 25  | 2   | 0   | 0   | 0   | 0   | 0   | 0    | 2.46    |
| 118 | 50                                                   | 0   | 0   | 0   | 0   | 0   | 0   | 0   | 0   | 0    | 1       |
| 119 | 0                                                    | 2   | 49  | 0   | 0   | 0   | 0   | 0   | 0   | 0    | 2.96    |
| 121 | 0                                                    | 0   | 4   | 6   | 4   | 12  | 8   | 18  | 0   | 0    | 6.31    |
| 122 | 2                                                    | 37  | 10  | 1   | 0   | 0   | 0   | 0   | 0   | 0    | 2.2     |
| 124 | 1                                                    | 22  | 27  | 1   | 0   | 0   | 0   | 0   | 0   | 0    | 2.55    |
| 125 | 4                                                    | 6   | 45  | 0   | 0   | 0   | 0   | 0   | 0   | 0    | 2.75    |
| 126 | 4                                                    | 47  | 3   | 0   | 0   | 0   | 0   | 0   | 0   | 0    | 1.98    |
| 127 | 8                                                    | 21  | 25  | 0   | 0   | 0   | 0   | 0   | 0   | 0    | 2.31    |
| 128 | 2                                                    | 4   | 47  | 0   | 0   | 0   | 0   | 0   | 0   | 0    | 2.85    |
| 129 | 2                                                    | 11  | 39  | 1   | 0   | 0   | 0   | 0   | 0   | 0    | 2.74    |
| 130 | 2                                                    | 2   | 48  | 0   | 0   | 0   | 0   | 0   | 0   | 0    | 2.88    |
| 131 | 4                                                    | 46  | 6   | 0   | 0   | 0   | 0   | 0   | 0   | 0    | 2.04    |
| 132 | 36                                                   | 13  | 1   | 0   | 0   | 0   | 0   | 0   | 0   | 0    | 1.3     |
| 133 | 5                                                    | 43  | 3   | 0   | 0   | 0   | 0   | 0   | 0   | 0    | 1.96    |
| 134 | 2                                                    | 9   | 40  | 0   | 0   | 0   | 0   | 0   | 0   | 0    | 2.75    |
| 135 | 0                                                    | 2   | 49  | 0   | 0   | 0   | 0   | 0   | 0   | 0    | 2.96    |
| 136 | 0                                                    | 0   | 7   | 10  | 1   | 9   | 7   | 17  | 0   | 0    | 5.98    |
| 138 | 2                                                    | 27  | 32  | 0   | 0   | 0   | 0   | 0   | 0   | 0    | 2.49    |
| 139 | 0                                                    | 2   | 10  | 30  | 9   | 0   | 0   | 0   | 0   | 0    | 3.9     |
| 140 | 1                                                    | 4   | 46  | 0   | 0   | 0   | 0   | 0   | 0   | 0    | 2.88    |
| 141 | 1                                                    | 22  | 28  | 0   | 0   | 0   | 0   | 0   | 0   | 0    | 2.17    |
| 142 | 8                                                    | 42  | 1   | 0   | 0   | 0   | 0   | 0   | 0   | 0    | 1.86    |
| 143 | 3                                                    | 31  | 16  | 0   | 0   | 0   | 0   | 0   | 0   | 0    | 2.26    |
| 144 | 0                                                    | 0   | 9   | 28  | 1   | 12  | 1   | 3   | 0   | 0    | 4.57    |
| 146 | 9                                                    | 29  | 14  | 0   | 0   | 0   | 0   | 0   | 0   | 0    | 2.1     |
| 147 | 4                                                    | 34  | 12  | 0   | 0   | 0   | 0   | 0   | 0   | 0    | 2.16    |
| 148 | 2                                                    | 44  | 4   | 0   | 0   | 0   | 0   | 0   | 0   | 0    | 2.04    |
| 149 | 0                                                    | 13  | 39  | 0   | 0   | 0   | 0   | 0   | 0   | 0    | 2.75    |
| 150 | 50                                                   | 0   | 0   | 0   | 0   | 0   | 0   | 0   | 0   | 0    | 1       |
| 151 | 4                                                    | 7   | 40  | 0   | 0   | 0   | 0   | 0   | 0   | 0    | 2.7     |

(continued)

Supplementary Table SII Continued

| ID  | Number of seminiferous tubules with corresponding JS |     |     |     |     |     |     |     |     |      | Mean JS |
|-----|------------------------------------------------------|-----|-----|-----|-----|-----|-----|-----|-----|------|---------|
|     | JS1                                                  | JS2 | JS3 | JS4 | JS5 | JS6 | JS7 | JS8 | JS9 | JS10 |         |
| 152 | 1                                                    | 3   | 46  | 0   | 0   | 0   | 0   | 0   | 0   | 0    | 2.9     |
| 153 | 0                                                    | 2   | 6   | 5   | 4   | 6   | 7   | 15  | 5   | 0    | 6.2     |
| 154 | 2                                                    | 45  | 3   | 0   | 0   | 0   | 0   | 0   | 0   | 0    | 2.02    |
| 155 | 3                                                    | 5   | 43  | 0   | 0   | 0   | 0   | 0   | 0   | 0    | 2.78    |
| 156 | 4                                                    | 19  | 30  | 0   | 0   | 0   | 0   | 0   | 0   | 0    | 2.49    |
| 157 | 46                                                   | 6   | 3   | 0   | 0   | 0   | 0   | 0   | 0   | 0    | 1.22    |
| 158 | 0                                                    | 3   | 48  | 0   | 0   | 0   | 0   | 0   | 0   | 0    | 2.94    |
| 159 | 0                                                    | 4   | 47  | 0   | 0   | 0   | 0   | 0   | 0   | 0    | 2.92    |
| 160 | 6                                                    | 44  | 4   | 0   | 0   | 0   | 0   | 0   | 0   | 0    | 1.96    |
| 161 | 0                                                    | 27  | 24  | 0   | 0   | 0   | 0   | 0   | 0   | 0    | 2.47    |
| 162 | 0                                                    | 2   | 49  | 0   | 0   | 0   | 0   | 0   | 0   | 0    | 2.96    |
| 163 | 3                                                    | 18  | 28  | 2   | 0   | 0   | 0   | 0   | 0   | 0    | 2.57    |
| 164 | 3                                                    | 24  | 25  | 0   | 0   | 0   | 0   | 0   | 0   | 0    | 2.62    |
| 165 | 2                                                    | 7   | 42  | 0   | 0   | 0   | 0   | 0   | 0   | 0    | 2.78    |
| 166 | 0                                                    | 17  | 27  | 6   | 0   | 0   | 0   | 0   | 0   | 0    | 2.78    |
| 168 | 0                                                    | 0   | 0   | 9   | 7   | 10  | 3   | 17  | 4   | 0    | 6.48    |
| 169 | 5                                                    | 9   | 38  | 0   | 0   | 0   | 0   | 0   | 0   | 0    | 2.63    |
| 170 | 10                                                   | 14  | 30  | 0   | 0   | 0   | 0   | 0   | 0   | 0    | 2.37    |
| 171 | 4                                                    | 29  | 21  | 0   | 0   | 0   | 0   | 0   | 0   | 0    | 2.31    |
| 172 | 2                                                    | 33  | 17  | 0   | 0   | 0   | 0   | 0   | 0   | 0    | 2.29    |
| 173 | 2                                                    | 41  | 11  | 0   | 0   | 0   | 0   | 0   | 0   | 0    | 2.17    |
| 175 | 2                                                    | 31  | 16  | 4   | 0   | 0   | 0   | 0   | 0   | 0    | 2.42    |
| 176 | 4                                                    | 6   | 42  | 0   | 0   | 0   | 0   | 0   | 0   | 0    | 2.73    |
| 177 | 4                                                    | 31  | 18  | 0   | 0   | 0   | 0   | 0   | 0   | 0    | 2.26    |
| 178 | 2                                                    | 2   | 47  | 0   | 0   | 0   | 0   | 0   | 0   | 0    | 2.88    |
| 179 | 1                                                    | 5   | 45  | 0   | 0   | 0   | 0   | 0   | 0   | 0    | 2.86    |
| 182 | 2                                                    | 8   | 37  | 4   | 0   | 0   | 0   | 0   | 0   | 0    | 2.84    |
| 183 | 3                                                    | 28  | 22  | 0   | 0   | 0   | 0   | 0   | 0   | 0    | 2.36    |
| 184 | 6                                                    | 42  | 5   | 0   | 0   | 0   | 0   | 0   | 0   | 0    | 1.98    |
| 186 | 2                                                    | 27  | 21  | 6   | 0   | 0   | 0   | 0   | 0   | 0    | 2.55    |
| 187 | 2                                                    | 11  | 39  | 0   | 0   | 0   | 0   | 0   | 0   | 0    | 2.71    |
| 188 | 2                                                    | 39  | 16  | 0   | 0   | 0   | 0   | 0   | 0   | 0    | 2.25    |
| 190 | 43                                                   | 7   | 0   | 0   | 0   | 0   | 0   | 0   | 0   | 0    | 1.14    |
| 192 | 0                                                    | 10  | 27  | 15  | 3   | 0   | 0   | 0   | 0   | 0    | 3.02    |
| 194 | 4                                                    | 10  | 38  | 0   | 0   | 0   | 0   | 0   | 0   | 0    | 2.65    |
| 195 | 37                                                   | 11  | 2   | 0   | 0   | 0   | 0   | 0   | 0   | 0    | 1.3     |
| 197 | 17                                                   | 18  | 11  | 5   | 0   | 0   | 0   | 0   | 0   | 0    | 2.12    |
| 198 | 5                                                    | 9   | 40  | 0   | 0   | 0   | 0   | 0   | 0   | 0    | 2.65    |
| 199 | 3                                                    | 44  | 4   | 0   | 0   | 0   | 0   | 0   | 0   | 0    | 2.02    |
| 201 | 2                                                    | 7   | 42  | 0   | 0   | 0   | 0   | 0   | 0   | 0    | 2.78    |
| 203 | 0                                                    | 9   | 42  | 0   | 0   | 0   | 0   | 0   | 0   | 0    | 2.82    |
| 204 | 9                                                    | 38  | 4   | 0   | 0   | 0   | 0   | 0   | 0   | 0    | 1.9     |
| 205 | 16                                                   | 47  | 0   | 0   | 0   | 0   | 0   | 0   | 0   | 0    | 1.74    |

(continued)
